# Supplementary material
Source: HighWire-hosted journal article supplement (https://www.jneurosci.org/highwire/filestream/598391/field_highwire_adjunct_files/0/Supplemental_materials.pdf)
Supplement: Supplemental_materials.pdf [file Supplemental_materials.pdf]

Supplemental table 1. The information of the patients that were used in the study.

| Patient# | Age | Gender | Cold PMI <sup>1</sup> | Frozen PMI <sup>1</sup> | Neuropathological Diagnosis              |
|----------|-----|--------|-----------------------|-------------------------|------------------------------------------|
| T92      | 68  | M      | 2:09                  | 11:29                   | no abnormality recognized                |
| T99      | 44  | M      | 23:10                 | 49:15                   | no abnormality recognized                |
| T111     | 33  | M      | 3:40                  | 34:50                   | no abnormality recognized                |
| T136     | 64  | W      | 7:50                  | 11:30                   | no abnormality recognized                |
| T139     | 57  | M      | unknown               | unknown                 | no abnormality recognized                |
| T147     | 92  | W      | 1:55                  | 6:55                    | no abnormality recognized                |
| T148     | 66  | M      | 10:25                 | 21:55                   | no abnormality recognized                |
| T159     | 54  | W      | 3:40                  | 15:40                   | no abnormality recognized                |
| T164     | 41  | M      | 1:46                  | 7:01                    | no abnormality recognized                |
| T168     | 57  | M      | 5:09                  | 6:29                    | no abnormality recognized                |
| T230     | 87  | M      | 5:10                  | 6:40                    | Alzheimer changes, mild <sup>2</sup>     |
| T243     | 77  | W      | unknown               | 11:50                   | Parkinson disease, moderate <sup>3</sup> |
| T247     | 90  | W      | 6:40                  | 8:45                    | Alzheimer's Disease <sup>4</sup>         |
| T267     | 73  | M      | 5:30                  | 22:45                   | Alzheimer's Disease <sup>4</sup>         |
| T278     | 86  | M      | 2:05                  | 50:25                   | Alzheimer's Disease <sup>4</sup>         |
| T279     | 83  | M      | 3:45                  | 5:35                    | Alzheimer's Disease <sup>4</sup>         |
| T293     | 89  | W      | 13:50                 | 15:45                   | Alzheimer's Disease <sup>4</sup>         |
| T313     | 83  | W      | 6:30                  | 8:15                    | Alzheimer's Disease <sup>4</sup>         |
| T314     | 85  | W      | 4:13                  | 6:23                    | Alzheimer's Disease <sup>4</sup>         |
| T324     | 85  | W      | 4:15                  | 8:35                    | Alzheimer's Disease <sup>4</sup>         |
| T344     | 89  | W      | 5:00                  | 7:30                    | Alzheimer's Disease <sup>4</sup>         |
| T360     | 74  | M      | 5:15                  | 23:45                   | Alzheimer's Disease <sup>4</sup>         |
| T567     | 84  | M      | 4:24                  | 6:19                    | Alzheimer's Disease <sup>4</sup>         |
| T704     | 83  | M      | 11:35                 | 13:05                   | Alzheimer's Disease <sup>4</sup>         |
| T725     | 65  | W      | 4:35                  | 5:45                    | Alzheimer's Disease <sup>4</sup>         |
| T3799    | 98  | W      | 2:55                  | 14:09                   | Alzheimer changes, mild <sup>2</sup>     |

<sup>1</sup> post-mortem interval

Cold PMI is computed according to the following formula:

Cold PMI (in hours) = Time when the body, or brain is put in cold – Time of death

Frozen PMI (or PMI) is computed according to the following formula:

Frozen PMI (in hours) = PMI = (Time starting processing + 1 h) – Time of death

<sup>2</sup> These individuals were having occasional neuritic plaques or tangles or both in the brain without neurologic or psychiatric disorder, but with normal cognition.

<sup>3</sup> Encephalopathy, degenerative, moderate, consistent with Parkinson disease

<sup>4</sup> Encephalopathy, degenerative, marked, consistent with Alzheimer disease

Supplemental figure 1.

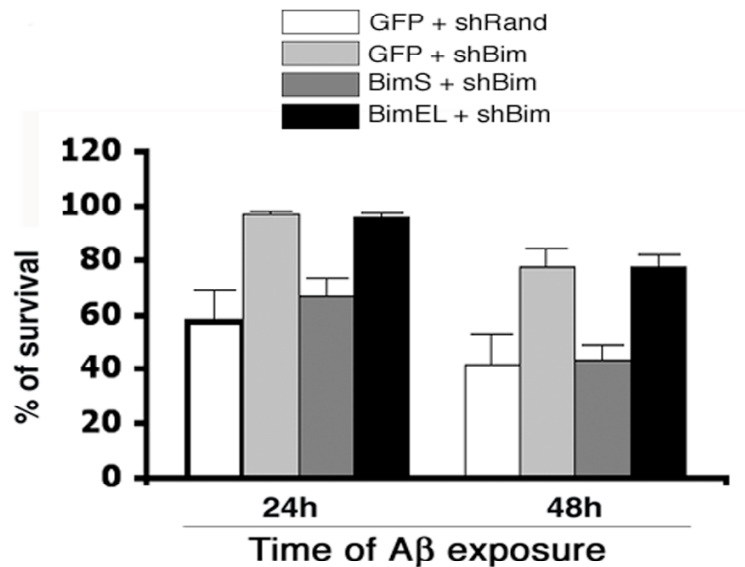

**Bim shRNA does not provide protection against death evoked by Aβ in presence of the short isoform of Bim (BimS) that is not targeted by shBim.** Cortical neurons were transfected with PCMS-eGFP (GFP), PCMS-BimS-eGFP (BimS) or PCMS-BimEL-eGFP (BimEL) with pSIREN-Bim-shRNA-ZsGreen (shBim) or pSIREN-Random-shRNA-ZsGreen (shRand), maintained for 48h in presence of a pan caspase inhibitor (25 μM ZVAD-fmk) and then washed twice with medium and treated with 1 μM oligomeric Aβ as indicated. Numbers of surviving transfected (green) cells were counted just after treatment with Aβ and after 24h and 48h. Data represent means ± SEM of 3 replicates. The results show that Bim shRNA provides significant protection of cultured cortical neurons from death evoked by Aβ even in presence of exogenous BimEL but does not protect them in presence of BimS (shBim does not target BimS) after Aβ exposure.

Supplemental Figure 2.

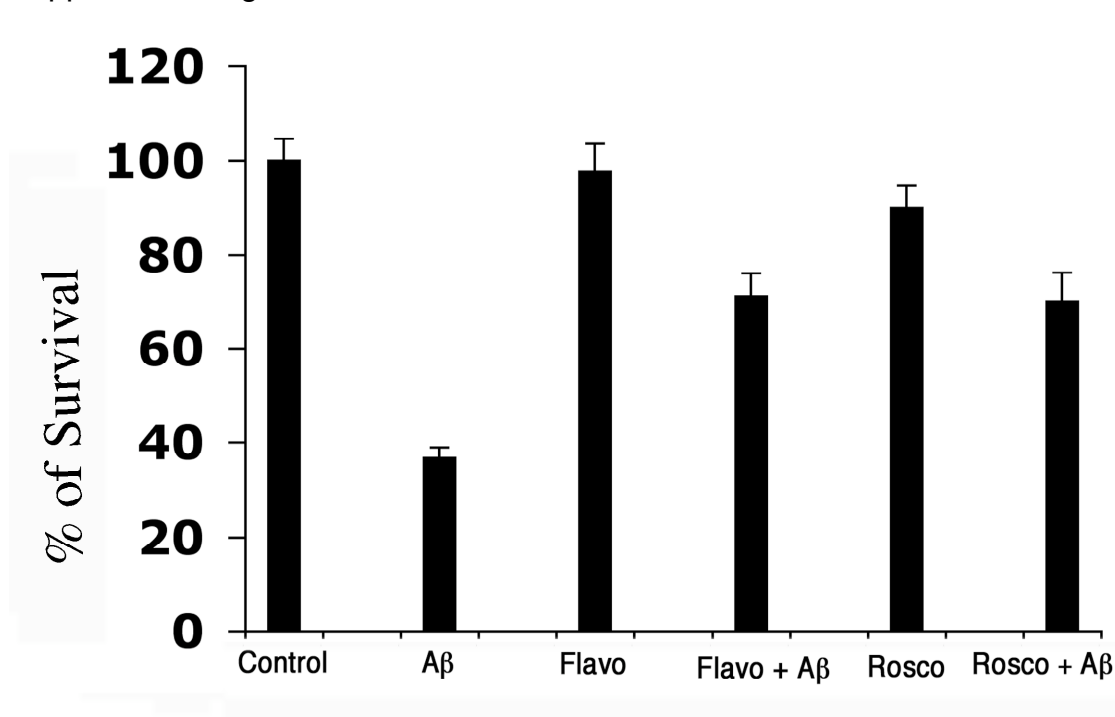

**Cdk inhibitors protect neurons from apoptotic death evoked by A $\beta$ .** Cortical neurons were cultured in 24-well dishes for 5 d, and then treated with 1  $\mu$ M oligomeric A $\beta$  in presence and absence of 1  $\mu$ M flavopiridol (Flavo) or 20  $\mu$ M roscovitine (Rosco). After 48 hr the cells were lysed, and the numbers of intact nuclei were counted. Cell survival was expressed as a percentage of the number of living cells in the treated cultures compared with the controls. Please note that cdk inhibitors, falovopiridol and roscovitine protected cultured cortical neurons from death evoked by A $\beta$ .
